# Supplementary material for: Metal–metalloid alloys: mesoporous Rh–Te films for electrocatalytic nitrogen fixation
Source: Royal Society of Chemistry journal article supplement (doi:10.1039/d3ta03548d), 2023-01-01
Supplement: d3ta03548d1.pdf [file d3ta03548d1.pdf]

Electronic Supplementary Information *for*

**Metal-metalloid alloys: mesoporous Rh-Te films for electrocatalytic nitrogen  
fixation**

Ziqiang Wang, Duanyang Li, Xian Zhang, Hongjie Yu, Kai Deng, You Xu, Hongjing Wang\*  
and Liang Wang\*

State Key Laboratory Breeding Base of Green-Chemical Synthesis Technology, College of Chemical  
Engineering, Zhejiang University of Technology, Hangzhou 310014, P. R. China

\*Corresponding authors' E-mails: [hjw@zjut.edu.cn](mailto:hjw@zjut.edu.cn); [wangliang@zjut.edu.cn](mailto:wangliang@zjut.edu.cn)

## Experimental section

### Materials and chemicals

Potassium hexachlororhodate ( $\text{K}_3\text{RhCl}_6$ ), sodium tellurite ( $\text{Na}_2\text{TeO}_3$ ), tetrahydrofuran (THF), ethanol, hydrochloric acid (37%, HCl), sodium hydroxide (NaOH), sodium salicylate ( $\text{C}_7\text{H}_5\text{NaO}_3$ ) and sodium sulfate (99%,  $\text{Na}_2\text{SO}_4$ ), ammonium chloride ( $\text{NH}_4\text{Cl}$ ), sodium hypochlorite solution (6.0-14.0%, NaClO) and sodium nitroferricyanide dihydrate ( $\text{C}_5\text{FeN}_6\text{Na}_2\text{O}\cdot 2\text{H}_2\text{O}$ , 99%) were ordered from Aladdin. Poly(ethylene oxide)-*b*-poly(methyl methacrylate) (PEO-*b*-PMMA) and polystyreneblock-polyethylene oxide (PS-*b*-PEO) was produced by Polymer Source Inc.

### Synthesis of the mRhTe/CP

The carbon paper (CP) was first immersed in 3 M HCl for 15 min, followed by cleaning with water. Then, 5 mg of PEO<sub>10500</sub>-*b*-PMMA<sub>18000</sub> was dissolved in 0.5 mL of THF, followed by homogeneously mixing with 0.5 mL of 40 mM  $\text{K}_3\text{RhCl}_6$ , 0.5 mL of 5 mM  $\text{Na}_2\text{TeO}_3$ , and 3.5 mL of  $\text{H}_2\text{O}$ . Electrodeposition was performed by electrochemical workstation (CHI 660E) in a three-electrode cell at -0.2 V for 3200 s, in which Pt wire, clean CP and Ag/AgCl were employed as counter electrode, working electrode and reference electrode. Finally, the sample was cleaned with ultra-pure water and ethanol, and soaked in ethanol overnight.

### Characterization

Scanning electron microscope (SEM, ZEISS SUPRA 55) and transmission electron microscopy (TEM, JEM-2100) equipped with energy dispersive X-ray spectroscopy (EDX) were conducted to investigate the morphology and microstructure of samples. X-ray diffraction (XRD, PANalytical X'Pert Pro MPD) and X-ray photoelectron spectroscopy (XPS, ESCALAB MK II) were performed to study the crystal and electronic structures of samples.

### Electrochemical measurements

The NRR tests were performed under ambient conditions in a standard three-electrode cell using obtained samples, Ag/AgCl electrode and carbon rod as working electrode, reference electrode and counter electrode, respectively. Prior to each NRR test, electrolytes (0.1 M Na<sub>2</sub>SO<sub>4</sub>) were purged with nitrogen for 0.5 h. Then the *i-t* tests were carried out for 2 h with continual flow of N<sub>2</sub>. All linear sweep voltammetry (LSV) tests were performed at a sweep rate of 5 mV s<sup>-1</sup> with *iR* compensation and all potentials were converted to reversible hydrogen electrode (RHE) potential. Electrochemical impedance spectroscopy (EIS) was conducted over a frequency range of 100 kHz to 0.1 Hz.

### Product detection

To determine the NH<sub>3</sub> production, the indophenol blue method was utilized.<sup>1</sup> For preparing the colorant, C<sub>7</sub>H<sub>5</sub>NaO<sub>3</sub> (1.28 g) and NaOH (0.256 g) were dissolved in water (20 mL). The oxidation solution was prepared by dissolving NaOH (0.3 g) in NaClO (0.325 mL) and deionized water (10 mL), while the color development solution was synthesized by dissolving C<sub>5</sub>FeN<sub>6</sub>Na<sub>2</sub>O (0.1 g) in water (10 mL). Then, 4 mL of electrolytes were mixed with 500 μL of colorant, 50 μL of oxidation solution, and 50 μL of color development solution in the dark for an hour, which were measured by ultraviolet-visible (UV-vis) at room temperature. The NH<sub>3</sub> yield was then calculated using standard NH<sub>4</sub>Cl solutions and concentration-absorbance curves. The NH<sub>3</sub> yield ( $r_{\text{NH}_3}$ ) and Faraday efficiency (FE) were determined using the following equations, in which the  $c_{\text{NH}_3}$  is the mass concentration of produced NH<sub>3</sub>, the  $V$  is the volume of the cathodic reaction electrolyte,  $t$  is the time of applied potential,  $m_{\text{cat}}$  is the loaded mass,  $F$  is the Faraday constant and  $Q$  is the total applied charge.

$$r_{\text{NH}_3} = (c_{\text{NH}_3} \times V) / (t \times m) \quad (1)$$

$$\text{FE} = 3F \times c_{\text{NH}_3} \times V / (17 \times Q) \quad (2)$$

By-product of hydrazine was also measured by the Watt and Chrisp method.<sup>2</sup> Typically, 5 mL of color reagent and 5 mL of electrolyte were mixed, in which the color reagent contained p-(dimethylamino) benzaldehyde (5.99 g), HCl (30 mL) and ethanol (300 mL). After maintaining for 10 min, the resultant solutions were conducted by UV–vis spectrophotometry to measure absorbance. The absorbance-concentration curve was first obtained from standard hydrazine hydrate solution with known concentration, and the by-product hydrazine content was calculated by means of the concentration-absorbance curve.

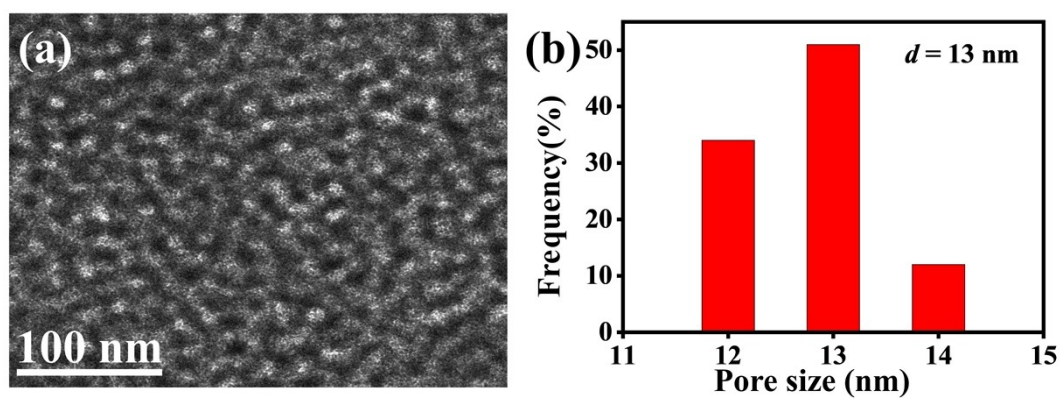

**Fig. S1** TEM image and (b) corresponding pore size distribution of the mRhTe/CP.

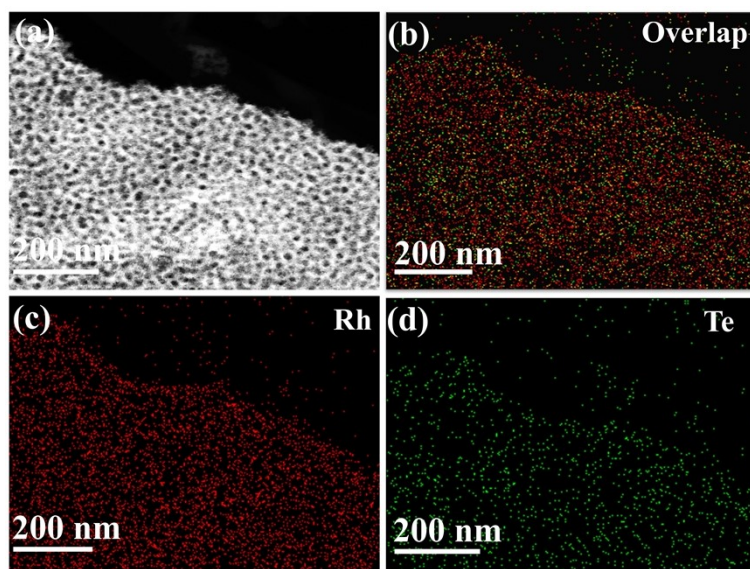

**Fig. S2** (a) HAADF-STEM image and (b-d) EDX elemental mapping images of the mRhTe films.

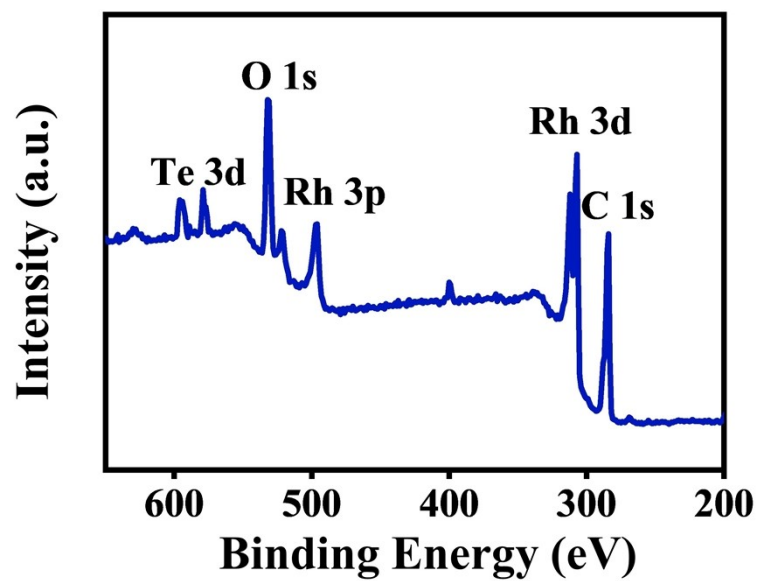

**Fig. S3** XPS survey spectrum of mRhTe/CP

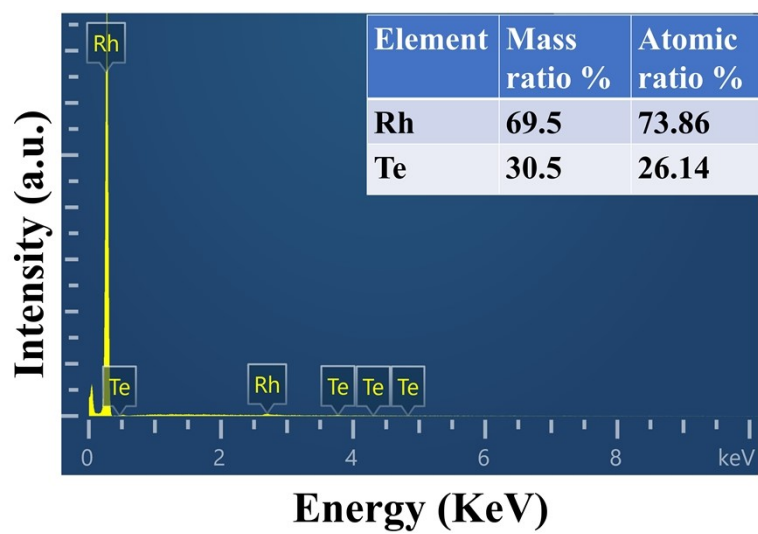

**Fig. S4** EDX spectrum of the mRhTe/CP and corresponding element amount.

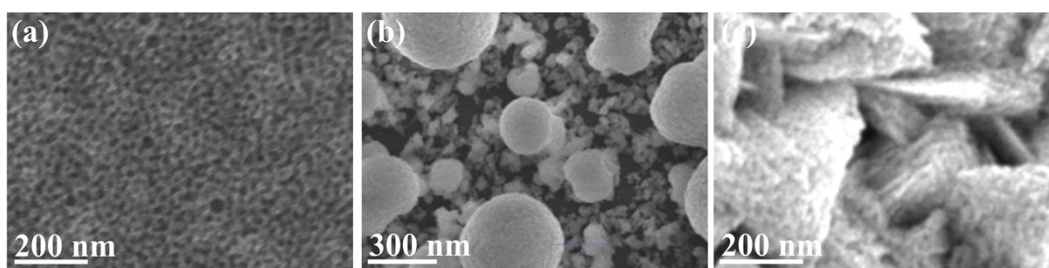

**Fig. S5** SEM images of samples obtained from different molar concentrations of metallic precursors:

(a) 1:0, (b) 1:1 and (c) 0:1.

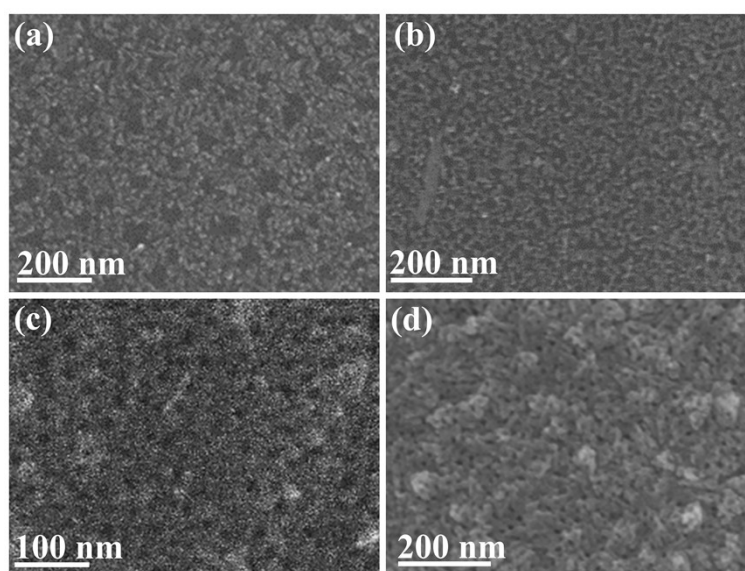

**Fig. S6** SEM images of typical samples at different electrodeposition times for (a) 1000 s, (b) 2000 s, (c) 3000 s, and (d) 4000 s.

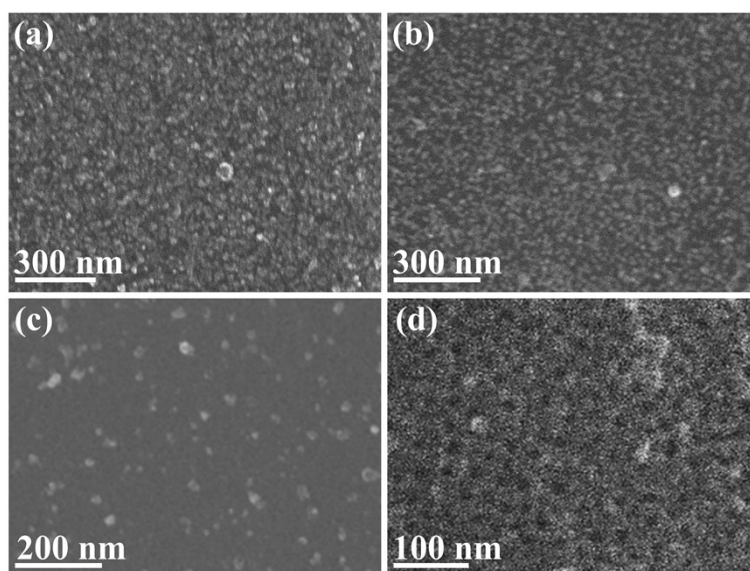

**Fig. S7** SEM images of the mRhTe/CP prepared by changing surfactant with (a) PS-b-PEO, (b) F127, (c) P123, and (d) PEO-b-PMMA.

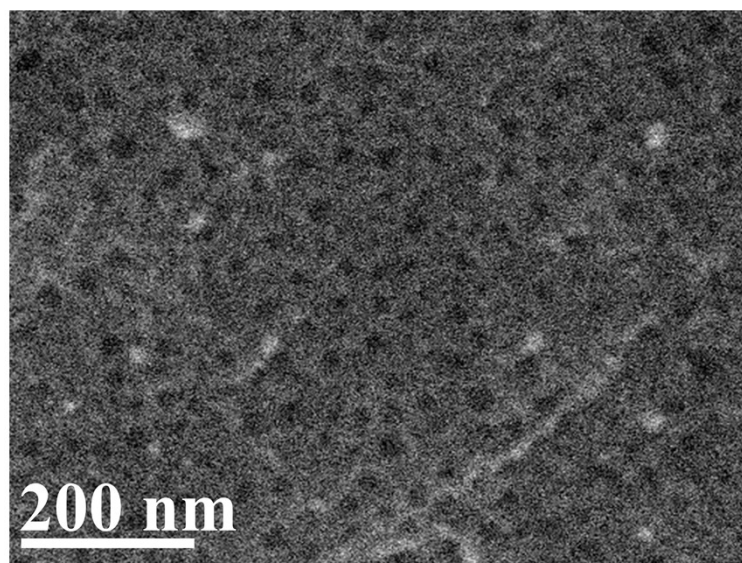

**Fig. S8** SEM image of mRhTe/NF.

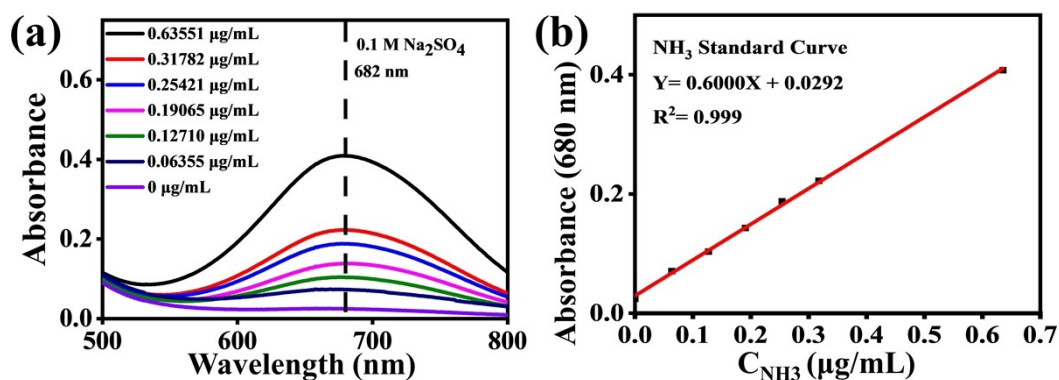

**Fig. S9** (a) UV-vis absorption spectra of various  $\text{NH}_4^+$  concentrations with the color reagent for 1 h at room temperature. (b) Calibration curve used to estimate the concentrations of  $\text{NH}_3$ .

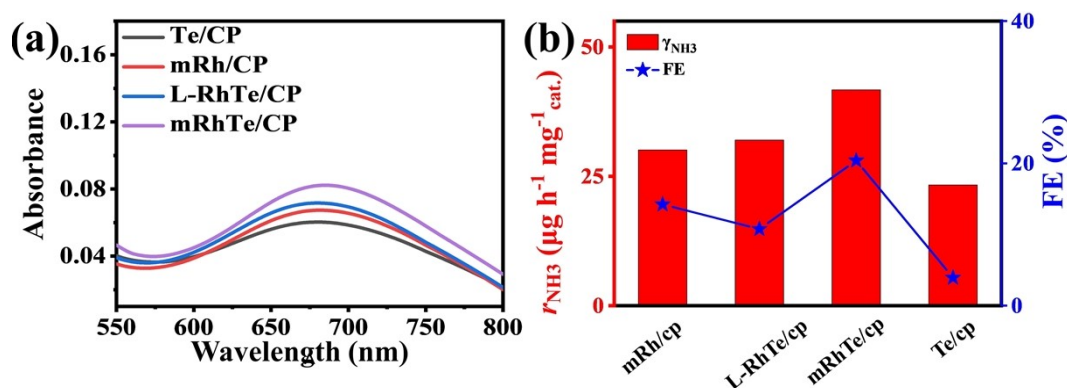

**Fig. S10** (a) UV-vis absorption spectra of RhTe/CP obtained by electrodeposition of potassium hexachlororhodate and sodium tellurite solutions with different molar concentrations, and (b)  $\text{NH}_3$  yield and Faraday efficiency at 0.1 V.

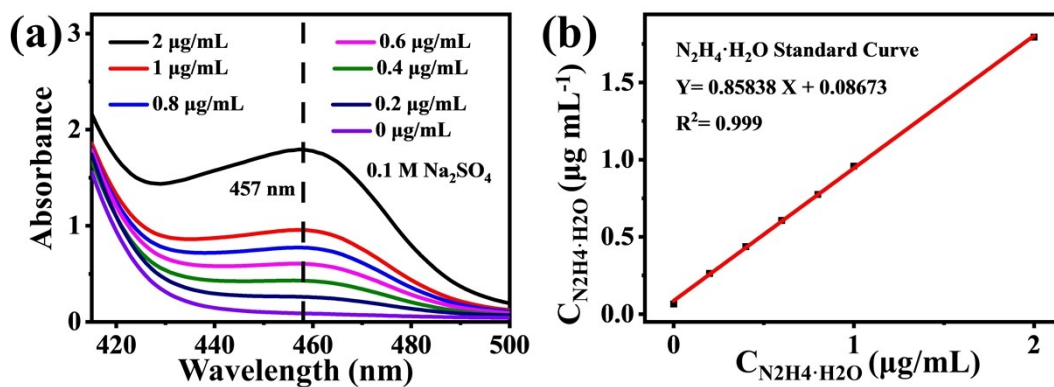

**Fig. S11** (a) UV-Vis absorption spectra of different concentrations of hydration solution were measured after incubated for 15 min at 25 °C. (b) Calibration curve used for estimation of  $\text{N}_2\text{H}_4\cdot\text{H}_2\text{O}$  concentration.

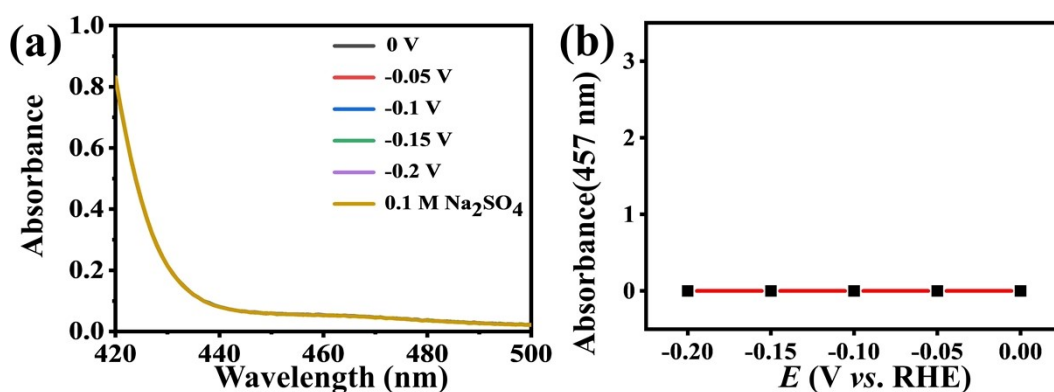

**Fig. S12** UV-vis absorption spectra of the electrolytes after 2 h electrolysis in nitrogen at different potentials, and (b) the  $\text{N}_2\text{H}_4$  concentration of the electrolyte.

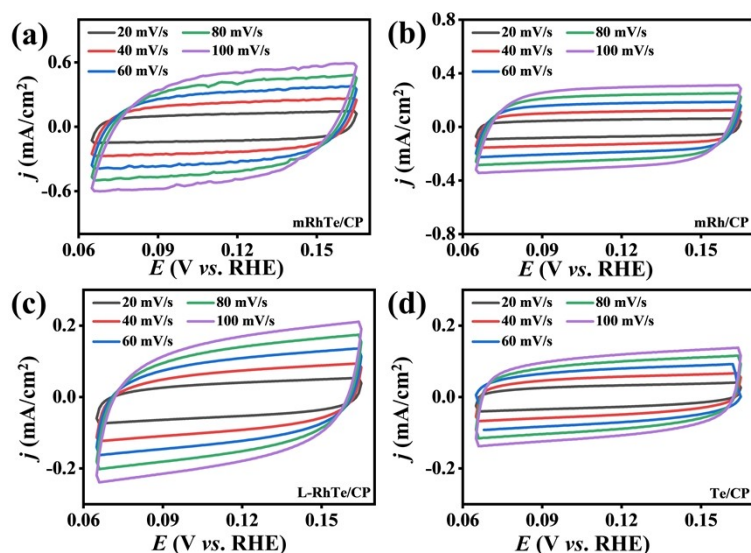

**Fig. S13** CV curves of samples in the range of 0.06 to 0.16 V.

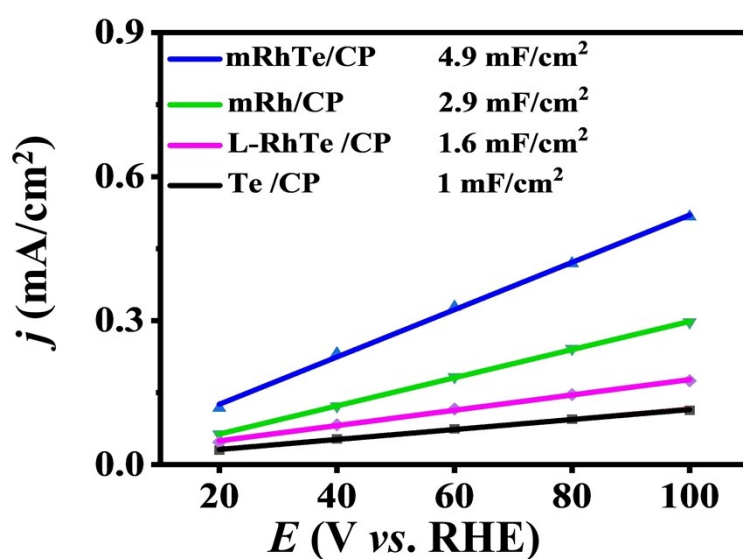

**Fig. S14** Capacitive current densities at 0.745 V derived from CVs against scan rates for different samples.

**Table S1** The comparison of NRR performance for mRhTe/CP with recently reported catalysts under the ambient conditions.

| Catalyst               | Electrolyte                               | NH <sub>3</sub> yield                                                    | FE (%)      | Ref.             |
|------------------------|-------------------------------------------|--------------------------------------------------------------------------|-------------|------------------|
| <b>mRhTe/CP</b>        | <b>0.1 M Na<sub>2</sub>SO<sub>4</sub></b> | <b>41.7 <math>\mu\text{g h}^{-1} \text{mg}^{-1}_{\text{cat.}}</math></b> | <b>20.4</b> | <b>This work</b> |
| S-mAu film             | 0.1 M Na <sub>2</sub> SO <sub>4</sub>     | 22.7 $\mu\text{g h}^{-1} \text{cm}^{-2}$                                 | 17.2        | 3                |
| mPd-PdO/NF             | 0.1 M Na <sub>2</sub> SO <sub>4</sub>     | 24.8 $\mu\text{g h}^{-1} \text{mg}^{-1}_{\text{cat.}}$                   | 16.64       | 4                |
| pAu/NF                 | 0.1 M Na <sub>2</sub> SO <sub>4</sub>     | 9.42 $\mu\text{g h}^{-1} \text{cm}^{-2}$                                 | 13.36       | 5                |
| PdCuIr-LS              | 0.1 M Na <sub>2</sub> SO <sub>4</sub>     | 13.43 $\mu\text{g h}^{-1} \text{mg}^{-1}_{\text{cat.}}$                  | 5.29        | 6                |
| mAu <sub>3</sub> Rh/NF | 0.1 M Na <sub>2</sub> SO <sub>4</sub>     | 26.29 $\mu\text{g h}^{-1} \text{mg}^{-1}_{\text{cat.}}$                  | 23.84       | 7                |
| nPdB/NF                | 0.1 M Na <sub>2</sub> SO <sub>4</sub>     | 29.0 $\mu\text{g h}^{-1} \text{mg}^{-1}_{\text{Cat.}}$                   | 17.9        | 8                |
| BNS                    | 0.1 M Na <sub>2</sub> SO <sub>4</sub>     | 13.22 $\mu\text{g h}^{-1} \text{mg}^{-1}_{\text{Cat.}}$                  | 4.04        | 9                |
| nPd/NF                 | 0.1 M Na <sub>2</sub> SO <sub>4</sub>     | 18.27 $\mu\text{g h}^{-1} \text{mg}^{-1}_{\text{cat}}$                   | 10.36       | 10               |
| dendritic Cu           | 0.1 M HCl                                 | 25.63 $\mu\text{g h}^{-1} \text{mg}^{-1}_{\text{Cat.}}$                  | 15.12       | 11               |
| Bi nanodendrites       | 0.1 M HCl                                 | 25.86 $\mu\text{g h}^{-1} \text{mg}^{-1}_{\text{cat.}}$                  | 10.8        | 12               |

## References

1. D. Zhu, L. Zhang, R.E. Ruther, R.J. Hamers, *Nat. Mater.* 2013, **12**, 836-841.
2. G. W. Watt and J. D. Chrisp, *Anal. Chem.*, 1952, **24**, 2006-2008.
3. M. Zhang, Z. Wang, H. Yu, S. Wang, Y. Xu, X. Li, L. Wang and H. Wang, *J. Mater. Chem.*, 2020, **8**, 20414-20419.
4. M. Zhang, L. Cui, Q. Mao, Z. Wang, H. Yu, Y. Xu, X. Li, L. Wang and H. Wang, *Nanotechnology*, 2022, **33**, 385703.
5. H. Wang, H. Yu, Z. Wang, Y. Li, Y. Xu, X. Li, H. Xue and L. Wang, *Small*, 2019, **15**, 1804769.
6. R. D. Kumar, Z. Wang, C. Li, A. V. Narendra Kumar, H. Xue, Y. Xu, X. Li, L. Wang and H. Wang, *J. Mater. Chem. A*, 2019, **7**, 3190-3196.
7. H. Wang, Q. Mao, H. Yu, S. Wang, Y. Xu, X. Li, Z. Wang and L. Wang, *Chem. Eng. J.*, 2021, **418**, 129493.
8. Z. Wang, M. Li, P. Wang, K. Deng, H. Yu, X. Wang, Y. Xu, H. Wang and L. Wang, *Chem. Eng. J.*, 2022, **449**, 137771.
9. X. Zhang, T. Wu, H. Wang, R. Zhao, H. Chen, T. Wang, P. Wei, Y. Luo, Y. Zhang and X. Sun, *ACS Catal.*, 2019, **9**, 4609-4615.
10. Z. Wang, Z. Dai, H. Yu, H. Zhang, W. Tian, Y. Xu, X. Li, L. Wang and H. Wang, *ACS Sustainable Chem. Eng.*, 2020, **8**, 11827-11833.
11. C. Li, S. Mou, X. Zhu, F. Wang, Y. Wang, Y. Qiao, X. Shi, Y. Luo, B. Zheng, Q. Li and X. Sun, *Chem. Commun.*, 2019, **55**, 14474-14477.
12. F. Wang, X. Lv, X. Zhu, J. Du, S. Lu, A. A. Alshehri, K. A. Alzahrani, B. Zheng and X. Sun, *Chem. Commun.*, 2020, **56**, 2107-2110.
